# Supplementary material for: Inducing large birefringence by enhancing asymmetric electron distribution of Y–O polyhedra
Source: Royal Society of Chemistry journal article supplement (doi:10.1039/d2qi00127f), 2022-01-01
Supplement: d2qi00127f1.pdf [file d2qi00127f1.pdf]

## Supporting Information

### **Inducing Large Birefringence by Increasing Asymmetric Electron Distribution of Y-O Polyhedra**

Mengen Gao<sup>[a]</sup>, Qiang Bian<sup>\*[b]</sup>, Hongping Wu<sup>\*[a]</sup>, Hongwei Yu<sup>[a]</sup>, Zhanggui Hu<sup>[a]</sup>, Jiyang Wang<sup>[a]</sup>  
and Yicheng Wu<sup>[a]</sup>

[a] Tianjin Key Laboratory of Functional Crystal Materials, Institute of Functional Crystal, Tianjin University of Technology, Tianjin 300384, China

E-mail: wuhp@ms.xjb.ac.cn

[b] School of Materials and Energy, Guangdong University of Technology

E-mail: bianqiang2006@126.com

|                                                                                                                                                                                                                                                                                                                                                                                                 |    |
|-------------------------------------------------------------------------------------------------------------------------------------------------------------------------------------------------------------------------------------------------------------------------------------------------------------------------------------------------------------------------------------------------|----|
| <b>Fig. S1</b> Powder XRD patterns for LiRb <sub>2</sub> YB <sub>2</sub> O <sub>6</sub> (a), CaRbYB <sub>2</sub> O <sub>6</sub> (b), Li <sub>2</sub> RbY <sub>4</sub> B <sub>5</sub> O <sub>15</sub> (c) and Li <sub>2</sub> CsY <sub>4</sub> B <sub>5</sub> O <sub>15</sub> (d). .....                                                                                                         | 1  |
| <b>Fig. S2</b> Infrared spectra of LiRb <sub>2</sub> YB <sub>2</sub> O <sub>6</sub> (a), CaRbYB <sub>2</sub> O <sub>6</sub> (b), Li <sub>2</sub> RbY <sub>4</sub> B <sub>5</sub> O <sub>15</sub> (c) and Li <sub>2</sub> CsY <sub>4</sub> B <sub>5</sub> O <sub>15</sub> (d). .....                                                                                                             | 2  |
| <b>Fig. S3</b> TG-DSC curves for (a) LiRb <sub>2</sub> YB <sub>2</sub> O <sub>6</sub> , (b) CaRbYB <sub>2</sub> O <sub>6</sub> , (c) Li <sub>2</sub> RbY <sub>4</sub> B <sub>5</sub> O <sub>15</sub> and (d) Li <sub>2</sub> CsY <sub>4</sub> B <sub>5</sub> O <sub>15</sub> . .....                                                                                                            | 3  |
| <b>Fig. S4</b> Photograph of crystal size for (a) LiRb <sub>2</sub> YB <sub>2</sub> O <sub>6</sub> , (b) CaRbYB <sub>2</sub> O <sub>6</sub> , (c) Li <sub>2</sub> RbY <sub>4</sub> B <sub>5</sub> O <sub>15</sub> and (d) Li <sub>2</sub> CsY <sub>4</sub> B <sub>5</sub> O <sub>15</sub> . .....                                                                                               | 4  |
| <b>Fig. S5</b> Calculated band gaps for (a) LiRb <sub>2</sub> YB <sub>2</sub> O <sub>6</sub> , (b) CaRbYB <sub>2</sub> O <sub>6</sub> , (c) Li <sub>2</sub> RbY <sub>4</sub> B <sub>5</sub> O <sub>15</sub> , (d) Li <sub>2</sub> CsY <sub>4</sub> B <sub>5</sub> O <sub>15</sub> . They are all direct band gap compounds with the band gaps of 4.5, 3.5, 4.87 and 4.65 eV, respectively. .... | 5  |
| <b>Table S1.</b> Crystallographic data and structure refinements for four compounds. ....                                                                                                                                                                                                                                                                                                       | 6  |
| <b>Table S2.</b> Atomic coordinates ( $\times 10^4$ ) and equivalent isotropic displacement parameters ( $\text{\AA}^2 \times 10^3$ ), $U_{eq}$ is defined as one third of the trace of the orthogonalized $U_{ij}$ tensor. ....                                                                                                                                                                | 7  |
| <b>Table S3.</b> Selected bond distances ( $\text{\AA}$ ) and angles (deg.).....                                                                                                                                                                                                                                                                                                                | 10 |

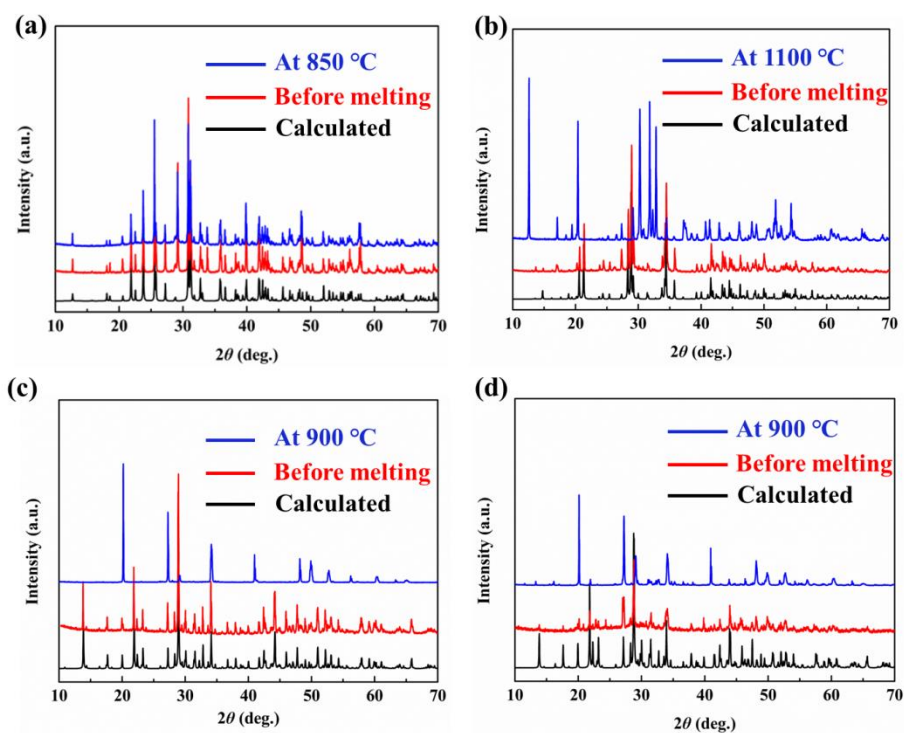

**Fig. S1** Powder XRD patterns for  $\text{LiRb}_2\text{YB}_2\text{O}_6$  (a),  $\text{CaRbYB}_2\text{O}_6$  (b),  $\text{Li}_2\text{RbY}_4\text{B}_5\text{O}_{15}$  (c) and  $\text{Li}_2\text{CsY}_4\text{B}_5\text{O}_{15}$  (d).

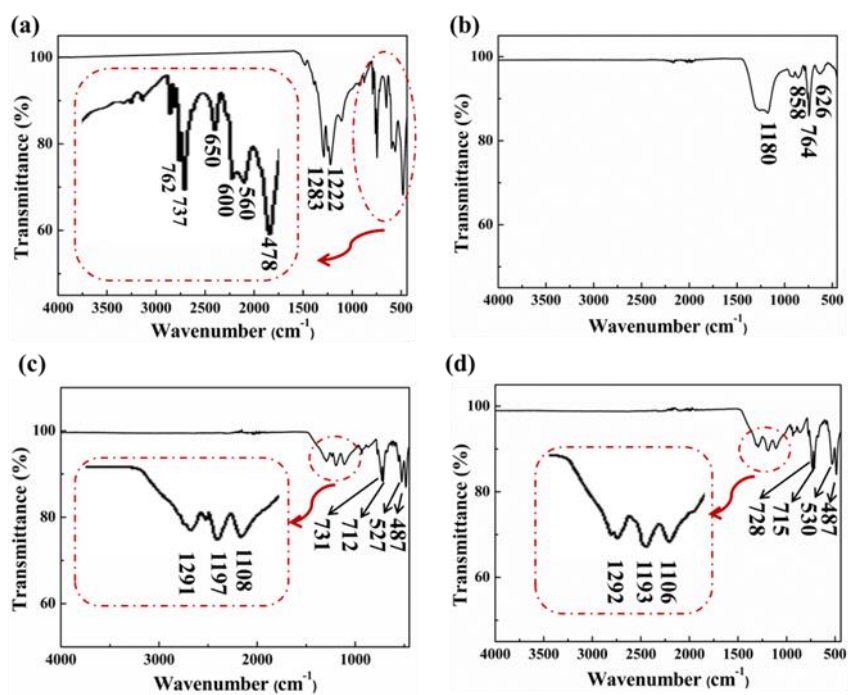

**Fig. S2** Infrared spectra of  $\text{LiRb}_2\text{YB}_2\text{O}_6$  (a),  $\text{CaRbYB}_2\text{O}_6$  (b),  $\text{Li}_2\text{RbY}_4\text{B}_5\text{O}_{15}$  (c) and  $\text{Li}_2\text{CsY}_4\text{B}_5\text{O}_{15}$  (d).

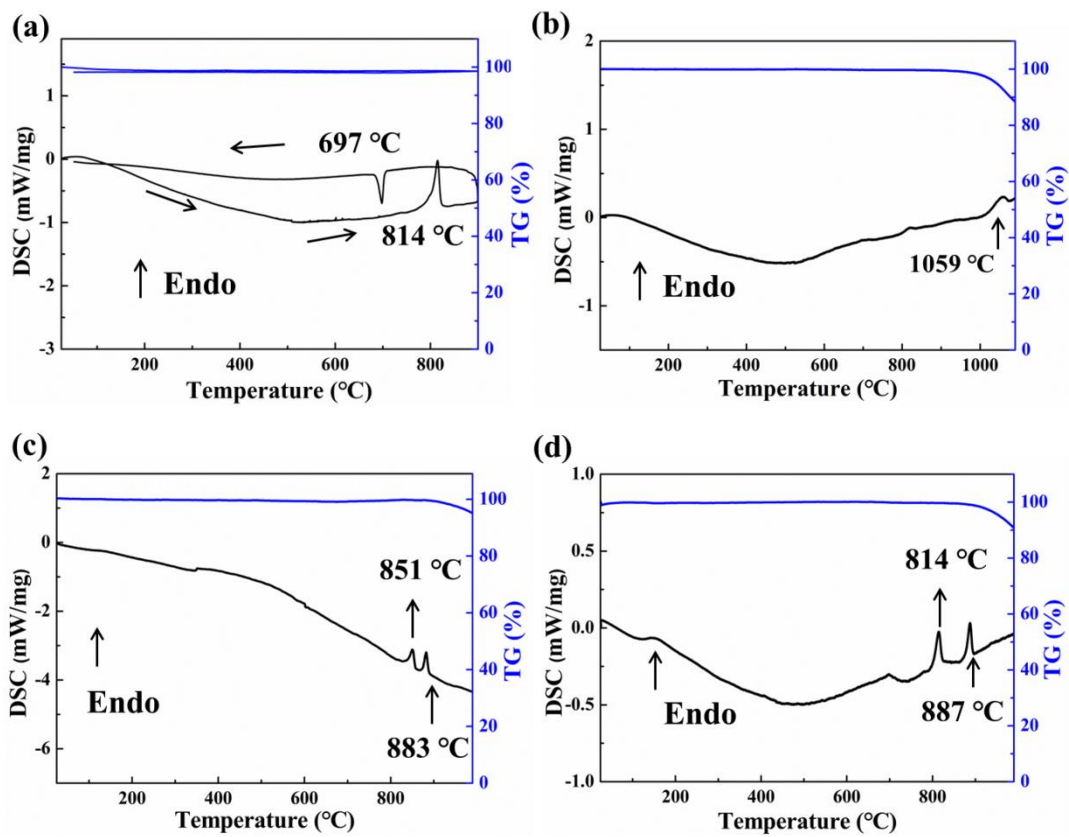

**Fig. S3** TG-DSC curves for (a)  $\text{LiRb}_2\text{YB}_2\text{O}_6$ , (b)  $\text{CaRbYB}_2\text{O}_6$ , (c)  $\text{Li}_2\text{RbY}_4\text{B}_5\text{O}_{15}$  and (d)  $\text{Li}_2\text{CsY}_4\text{B}_5\text{O}_{15}$ .

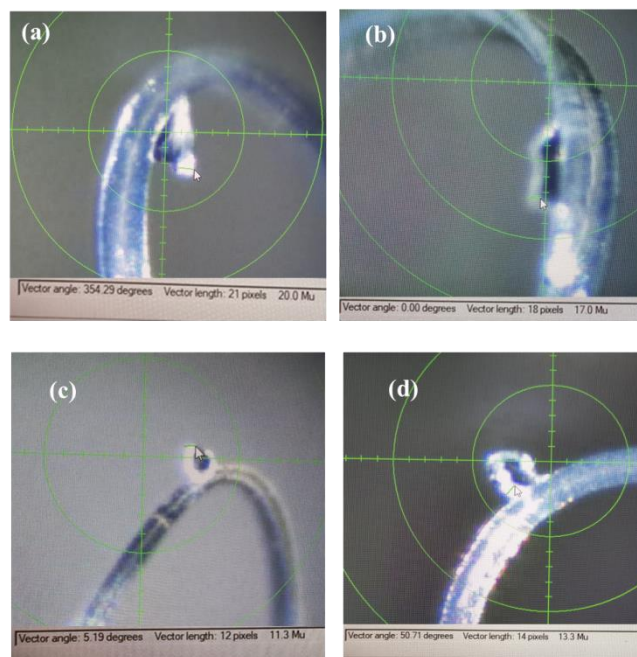

**Fig. S4** Photograph of crystal size for (a)  $\text{LiRb}_2\text{YB}_2\text{O}_6$ , (b)  $\text{CaRbYB}_2\text{O}_6$ , (c)  $\text{Li}_2\text{RbY}_4\text{B}_5\text{O}_{15}$  and (d)  $\text{Li}_2\text{CsY}_4\text{B}_5\text{O}_{15}$ .

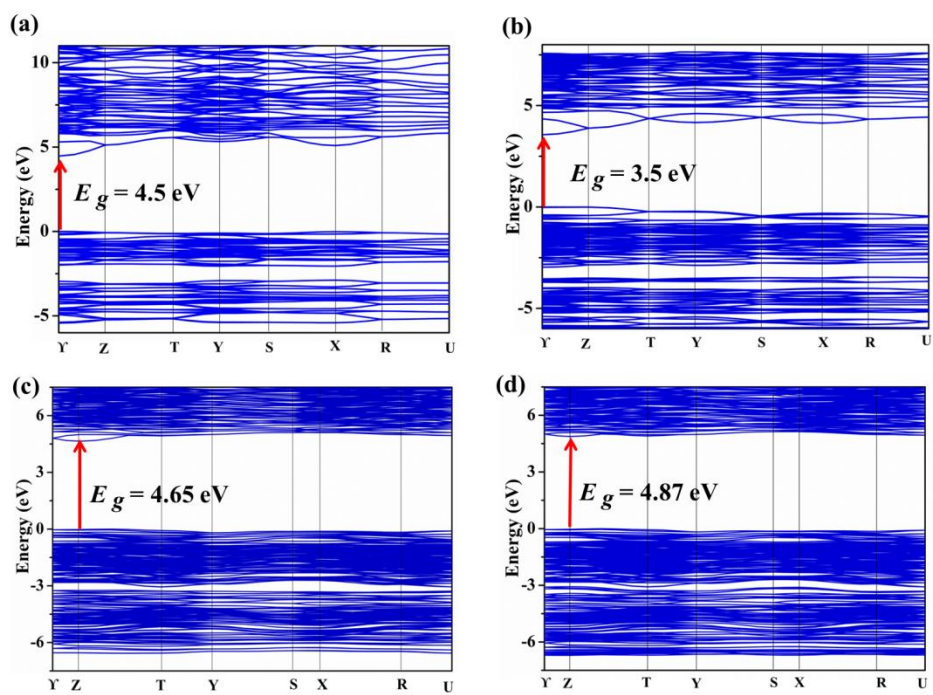

**Fig. S5** Calculated band gaps for (a)  $\text{LiRb}_2\text{YB}_2\text{O}_6$ , (b)  $\text{CaRbYB}_2\text{O}_6$ , (c)  $\text{Li}_2\text{RbY}_4\text{B}_5\text{O}_{15}$ , (d)  $\text{Li}_2\text{CsY}_4\text{B}_5\text{O}_{15}$ . They are all direct band gap compounds with the band gaps of 4.5, 3.5, 4.87 and 4.65 eV, respectively.

**Table S1.** Crystallographic data and structure refinements for four compounds.

| Empirical formula                                                                                                   | LiRb <sub>2</sub> YB <sub>2</sub> O <sub>6</sub> | CaRbYB <sub>2</sub> O <sub>6</sub> | Li <sub>2</sub> RbY <sub>4</sub> B <sub>5</sub> O <sub>15</sub> | Li <sub>2</sub> CsY <sub>4</sub> B <sub>5</sub> O <sub>15</sub> |
|---------------------------------------------------------------------------------------------------------------------|--------------------------------------------------|------------------------------------|-----------------------------------------------------------------|-----------------------------------------------------------------|
| Formula weight                                                                                                      | 384.41                                           | 332.08                             | 749.04                                                          | 796.48                                                          |
| Crystal system                                                                                                      | Orthorhombic                                     | Orthorhombic                       | Monoclinic                                                      | Monoclinic                                                      |
| Space group                                                                                                         | <i>Pbcm</i>                                      | <i>Pbca</i>                        | <i>P2/n</i>                                                     | <i>P2/n</i>                                                     |
| Unit cell (Å)                                                                                                       | <i>a</i> = 6.962(2)                              | <del><i>a</i> = 10.0405(8)</del>   | <i>a</i> = 10.5033(10)                                          | <i>a</i> = 10.5584(5)                                           |
|                                                                                                                     | <i>b</i> = 9.556(3)                              | <del><i>b</i> = 9.1393(5)</del>    | <i>b</i> = 6.3799(8)                                            | <i>b</i> = 6.3942(3)                                            |
|                                                                                                                     | <i>c</i> = 9.995(3)                              | <del><i>c</i> = 13.0367(8)</del>   | <i>c</i> = 19.735(2)<br><i>β</i> = 105.339(5)°                  | <i>c</i> = 19.8267(9)<br><i>β</i> = 105.267(2)°                 |
| Z, Volume (Å <sup>3</sup> )                                                                                         | 4, 665.0(3)                                      | 8, 1196.29(14)                     | 4, 1275.3(2)                                                    | 4, 1291.31(10)                                                  |
| Density (g cm <sup>-3</sup> )                                                                                       | 3.840                                            | 3.688                              | 3.901                                                           | 4.097                                                           |
| Absorption coefficient (mm <sup>-1</sup> )                                                                          | 23.286                                           | 18.657                             | 21.901                                                          | 20.663                                                          |
| Goodness-of-fit on <i>F</i> <sub>2</sub>                                                                            | 1.072                                            | 1.120                              | 1.090                                                           | 1.063                                                           |
| Final <i>R</i> indices [ <i>F</i> <sub>0</sub> <sup>2</sup> >2s( <i>F</i> <sub>0</sub> <sup>2</sup> )] <sup>a</sup> | <i>R</i> <sub>1</sub> = 0.0410                   | <i>R</i> <sub>1</sub> = 0.0743     | <i>R</i> <sub>1</sub> = 0.0483                                  | <i>R</i> <sub>1</sub> = 0.0214                                  |
|                                                                                                                     | <i>wR</i> <sub>2</sub> = 0.0911                  | <i>wR</i> <sub>2</sub> = 0.2106    | <i>wR</i> <sub>2</sub> = 0.0977                                 | <i>wR</i> <sub>2</sub> = 0.0440                                 |
| <i>R</i> indices (all data)                                                                                         | <i>R</i> <sub>1</sub> = 0.0677                   | <i>R</i> <sub>1</sub> = 0.0898     | <i>R</i> <sub>1</sub> = 0.0769                                  | <i>R</i> <sub>1</sub> = 0.0266                                  |
|                                                                                                                     | <i>wR</i> <sub>2</sub> = 0.1033                  | <i>wR</i> <sub>2</sub> = 0.2262    | <i>wR</i> <sub>2</sub> = 0.1105                                 | <i>wR</i> <sub>2</sub> = 0.0456                                 |



**Table S2.** Atomic coordinates ( $\times 10^4$ ) and equivalent isotropic displacement parameters ( $\text{Å}^2 \times 10^3$ ),  $U_{\text{eq}}$  is defined as one third of the trace of the orthogonalized  $U_{ij}$  tensor

| Atoms                                                           | x        | y         | z       | U(eq) | BVS  |
|-----------------------------------------------------------------|----------|-----------|---------|-------|------|
| <b>LiRb<sub>2</sub>YB<sub>2</sub>O<sub>6</sub></b>              |          |           |         |       |      |
| Rb(1)                                                           | 7792(1)  | 4141(1)   | 4453(1) | 26(1) | 1.13 |
| Li(1)                                                           | 490(30)  | 6492(19)  | 2500    | 21(5) | 1.23 |
| Y(1)                                                            | 6369(2)  | 7590(1)   | 2500    | 14(1) | 2.73 |
| B(1)                                                            | 3501(16) | 5566(12)  | 2500    | 8(2)  | 2.92 |
| B(2)                                                            | 7993(18) | 7500      | 5000    | 17(3) | 2.97 |
| O(1)                                                            | 3196(11) | 7011(7)   | 2500    | 19(2) | 2.16 |
| O(2)                                                            | 5345(11) | 5055(8)   | 2500    | 21(2) | 1.98 |
| O(3)                                                            | 8907(8)  | 6962(5)   | 3901(6) | 18(1) | 2.21 |
| O(4)                                                            | 6003(12) | 7500      | 5000    | 22(2) | 1.75 |
| O(5)                                                            | 1948(12) | 4681(8)   | 2500    | 29(2) | 1.81 |
| <b>CaRbYB<sub>2</sub>O<sub>6</sub></b>                          |          |           |         |       |      |
| Rb(1)                                                           | 3540(1)  | 5683(1)   | 4103(1) | 20(1) | 1.13 |
| Ca(1)                                                           | 6224(2)  | 7557(3)   | 2812(2) | 10(1) | 2.11 |
| Y(001)                                                          | 9129(1)  | 5975(1)   | 3870(1) | 13(1) | 2.97 |
| B(1)                                                            | 6247(11) | 7636(12)  | 5035(9) | 6(2)  | 2.98 |
| B(2)                                                            | 6374(10) | 4198(11)  | 2660(9) | 4(2)  | 3.03 |
| O(1)                                                            | 5436(9)  | 8608(9)   | 4509(7) | 16(2) | 1.88 |
| O(2)                                                            | 7604(9)  | 4763(10)  | 2904(7) | 19(2) | 2.03 |
| O(3)                                                            | 6244(8)  | 2703(9)   | 2596(6) | 14(2) | 2.02 |
| O(4)                                                            | 7198(8)  | 6881(9)   | 4514(6) | 15(2) | 1.97 |
| O(5)                                                            | 5353(9)  | 5126(9)   | 2475(7) | 18(2) | 2.04 |
| O(6)                                                            | 6017(10) | 7487(10)  | 6068(6) | 20(2) | 2.09 |
| <b>Li<sub>2</sub>RbY<sub>4</sub>B<sub>5</sub>O<sub>15</sub></b> |          |           |         |       |      |
| Rb(1)                                                           | 5596(1)  | -873(2)   | 3641(1) | 16(1) | 0.81 |
| Li(1)                                                           | 6422(12) | 10230(20) | 1530(6) | 7(3)  | 1.23 |
| Li(2)                                                           | 2228(14) | 200(20)   | 3419(6) | 11(3) | 1.32 |
| Y(1)                                                            | 7500     | 14144(2)  | 2500    | 6(1)  | 2.80 |
| Y(2)                                                            | 6428(1)  | -3580(1)  | 5537(1) | 5(1)  | 3.17 |
| Y(3)                                                            | 4557(1)  | 6609(1)   | 1500(1) | 6(1)  | 3.23 |
| Y(4)                                                            | 8432(1)  | 3536(1)   | 4539(1) | 6(1)  | 3.06 |
| Y(5)                                                            | 2500     | 14059(2)  | 2500    | 11(1) | 2.72 |

|       |         |           |         |       |      |
|-------|---------|-----------|---------|-------|------|
| B(1)  | 2500    | 8330(20)  | 2500    | 5(2)  | 3.08 |
| B(2)  | 7500    | 8450(20)  | 2500    | 9(3)  | 2.94 |
| B(3)  | 4509(9) | 12190(16) | 1481(4) | 8(2)  | 2.94 |
| B(4)  | 5434(9) | 4126(16)  | 3243(5) | 8(2)  | 2.96 |
| B(5)  | 3442(9) | -1939(16) | 4499(4) | 7(2)  | 2.96 |
| B(6)  | 8577(9) | -2000(16) | 4571(4) | 8(2)  | 2.93 |
| O(1)  | 5598(5) | 13319(9)  | 1403(3) | 6(1)  | 2.08 |
| O(2)  | 9672(5) | -3197(9)  | 4528(3) | 8(1)  | 2.01 |
| O(3)  | 6696(5) | 3435(9)   | 3567(3) | 12(1) | 1.87 |
| O(4)  | 2773(5) | 7239(9)   | 1965(2) | 7(1)  | 2.12 |
| O(5)  | 2309(5) | -3090(9)  | 4479(3) | 7(1)  | 2.07 |
| O(6)  | 3366(5) | 13303(9)  | 1482(2) | 6(1)  | 2.10 |
| O(7)  | 3461(5) | 92(9)     | 4304(3) | 8(1)  | 1.99 |
| O(8)  | 8405(5) | 43(9)     | 4403(3) | 10(1) | 2.06 |
| O(9)  | 4341(5) | 3635(10)  | 3469(3) | 13(1) | 1.94 |
| O(10) | 7500    | 10592(13) | 2500    | 9(2)  | 2.07 |
| O(11) | 4584(5) | -3129(9)  | 4703(3) | 10(1) | 2.12 |
| O(12) | 5270(6) | 5155(10)  | 2616(3) | 16(1) | 1.78 |
| O(13) | 6831(5) | 7332(9)   | 1912(2) | 6(1)  | 2.04 |
| O(14) | 2500    | 10477(13) | 2500    | 16(2) | 2.14 |
| O(15) | 7611(5) | -3206(9)  | 4753(3) | 11(1) | 2.04 |
| O(16) | 4585(5) | 10101(10) | 1583(3) | 13(1) | 2.19 |

**Li<sub>2</sub>CsY<sub>4</sub>B<sub>5</sub>O<sub>15</sub>**

|       |         |          |         |       |      |
|-------|---------|----------|---------|-------|------|
| Cs(1) | 552(1)  | 931(1)   | 3590(1) | 12(1) | 1.13 |
| Li(1) | 3610(6) | -225(9)  | 3479(3) | 11(1) | 1.21 |
| Li(2) | 2773(6) | 172(9)   | 6565(3) | 10(1) | 1.29 |
| Y(1)  | 5438(1) | 3413(1)  | 3504(1) | 5(1)  | 3.19 |
| Y(2)  | 1432(1) | 3588(1)  | 5538(1) | 4(1)  | 3.12 |
| Y(3)  | -2500   | -4051(1) | 2500    | 9(1)  | 2.68 |
| Y(4)  | 3440(1) | -3544(1) | 4544(1) | 5(1)  | 3.03 |
| Y(5)  | 2500    | 5863(1)  | 2500    | 6(1)  | 2.76 |
| B(1)  | -448(4) | 4095(6)  | 6766(2) | 6(1)  | 2.96 |
| B(2)  | 7500    | 1640(8)  | 2500    | 5(1)  | 3.01 |
| B(3)  | 1566(4) | -1907(6) | 5481(2) | 6(1)  | 2.95 |
| B(4)  | 2500    | 11556(8) | 2500    | 6(1)  | 2.96 |
| B(5)  | 5489(3) | -2185(6) | 3516(2) | 6(1)  | 2.95 |
| B(6)  | 3576(4) | 1988(6)  | 4586(2) | 6(1)  | 2.90 |
| O(1)  | 3369(2) | 3285(4)  | 6482(1) | 7(1)  | 2.07 |

---

|       |         |          |         |       |      |
|-------|---------|----------|---------|-------|------|
| O(2)  | 658(2)  | 3725(4)  | 6532(1) | 12(1) | 1.90 |
| O(3)  | 4419(2) | -3293(3) | 3615(1) | 7(1)  | 2.07 |
| O(4)  | 1701(2) | -3518(4) | 3584(1) | 11(1) | 1.90 |
| O(5)  | 5324(2) | -3198(4) | 5465(1) | 6(1)  | 1.96 |
| O(6)  | 3178(2) | 2661(4)  | 3077(1) | 6(1)  | 2.07 |
| O(7)  | 2717(2) | -3085(4) | 5535(1) | 6(1)  | 2.01 |
| O(8)  | 2500    | 9399(5)  | 2500    | 10(1) | 1.96 |
| O(9)  | 4707(3) | 4971(4)  | 2405(1) | 14(1) | 1.84 |
| O(10) | -446(2) | 3100(4)  | 4745(1) | 10(1) | 2.13 |
| O(11) | 7182(2) | 2764(4)  | 3021(1) | 9(1)  | 2.08 |
| O(12) | 1568(2) | 100(4)   | 5686(1) | 8(1)  | 2.13 |
| O(13) | 2634(2) | 3195(4)  | 4775(1) | 9(1)  | 2.08 |
| O(14) | 5413(2) | -98(4)   | 3418(1) | 10(1) | 2.17 |
| O(15) | 3420(2) | -47(4)   | 4409(1) | 8(1)  | 2.06 |
| O(16) | 7500    | -500(5)  | 2500    | 10(1) | 2.03 |

---

**Table S3.** Selected bond distances (Å) and angles (deg.)

---

| <b>LiRb<sub>2</sub>YB<sub>2</sub>O<sub>6</sub></b> |            |                     |            |
|----------------------------------------------------|------------|---------------------|------------|
| Rb(1)-O(2)                                         | 2.735(5)   | O(3)-Rb(1)-O(1)#3   | 123.20(17) |
| Rb(1)-O(3)                                         | 2.860(5)   | O(1)#1-Rb(1)-O(1)#3 | 109.65(10) |
| Rb(1)-O(1)#1                                       | 2.903(5)   | O(3)#2-Rb(1)-O(1)#3 | 62.65(18)  |
| Rb(1)-O(3)#2                                       | 3.016(6)   | O(4)#3-Rb(1)-O(1)#3 | 59.73(13)  |
| Rb(1)-O(4)#3                                       | 3.120(7)   | O(3)#4-Rb(1)-O(1)#3 | 95.35(17)  |
| Rb(1)-O(3)#4                                       | 3.150(5)   | B(1)#3-Rb(1)-O(1)#3 | 24.7(2)    |
| Rb(1)-O(5)#3                                       | 3.252(3)   | O(5)#3-Rb(1)-O(1)#3 | 42.71(17)  |
| Rb(1)-O(1)#3                                       | 3.310(3)   | O(3)#6-Li(1)-O(3)#7 | 99.1(10)   |
| Li(1)-O(3)#6                                       | 1.839(14)  | O(3)#6-Li(1)-O(1)   | 121.2(6)   |
| Li(1)-O(3)#7                                       | 1.839(14)  | O(3)#7-Li(1)-O(1)   | 121.2(6)   |
| Li(1)-O(1)                                         | 1.95(2)    | O(3)#6-Li(1)-O(5)   | 121.0(6)   |
| Li(1)-O(5)                                         | 2.00(2)    | O(3)#7-Li(1)-O(5)   | 121.0(6)   |
| Y(1)-O(1)                                          | 2.277(8)   | O(1)-Li(1)-O(5)     | 74.4(8)    |
| Y(1)-O(5)#8                                        | 2.316(8)   | O(1)-Y(1)-O(5)#8    | 134.4(3)   |
| Y(1)-O(3)                                          | 2.332(6)   | O(1)-Y(1)-O(3)      | 132.24(18) |
| Y(1)-O(3)#9                                        | 2.332(6)   | O(5)#8-Y(1)-O(3)    | 80.7(2)    |
| Y(1)-O(4)#9                                        | 2.5132(11) | O(1)-Y(1)-O(3)#9    | 132.24(18) |
| Y(1)-O(4)                                          | 2.5132(11) | O(5)#8-Y(1)-O(3)#9  | 80.7(2)    |
| Y(1)-O(2)                                          | 2.525(8)   | O(5)#8-Y(1)-O(2)    | 166.0(3)   |
| Y(1)-O(2)#8                                        | 2.641(8)   | O(3)-Y(1)-O(2)      | 88.13(18)  |
| B(1)-O(5)                                          | 1.372(14)  | O(3)#9-Y(1)-O(2)    | 88.13(18)  |
| B(1)-O(2)                                          | 1.373(13)  | O(4)#9-Y(1)-O(2)    | 86.48(6)   |
| B(1)-O(1)                                          | 1.397(13)  | O(4)-Y(1)-O(2)      | 86.48(6)   |
| B(2)-O(3)                                          | 1.370(8)   | O(1)-Y(1)-O(2)#8    | 77.2(2)    |
| B(2)-O(3)#10                                       | 1.370(8)   | O(5)#8-Y(1)-O(2)#8  | 57.2(3)    |
| B(2)-O(4)                                          | 1.386(15)  | O(3)-Y(1)-O(2)#8    | 124.86(17) |
| O(2)-Rb(1)-O(3)                                    | 74.3(2)    | O(3)#9-Y(1)-O(2)#8  | 124.86(17) |
| O(2)-Rb(1)-O(1)#1                                  | 66.17(19)  | O(4)#9-Y(1)-O(2)#8  | 89.12(9)   |
| O(3)-Rb(1)-O(1)#1                                  | 126.54(16) | O(4)-Y(1)-O(2)#8    | 89.12(9)   |
| O(2)-Rb(1)-O(3)#2                                  | 167.34(16) | O(2)-Y(1)-O(2)#8    | 136.73(6)  |
| O(3)-Rb(1)-O(3)#2                                  | 103.18(13) | O(5)-B(1)-O(2)      | 121.1(9)   |
| O(1)#1-Rb(1)-O(3)#2                                | 107.60(17) | O(5)-B(1)-O(1)      | 119.3(9)   |
| O(2)-Rb(1)-O(4)#3                                  | 75.99(17)  | O(2)-B(1)-O(1)      | 119.6(9)   |
| O(3)-Rb(1)-O(4)#3                                  | 137.51(14) | O(3)-Y(1)-O(3)#9    | 73.8(3)    |

---

|                                        |            |                     |            |
|----------------------------------------|------------|---------------------|------------|
| O(1)#1-Rb(1)-O(4)#3                    | 64.20(14)  | O(1)-Y(1)-O(4)#9    | 83.87(18)  |
| O(3)#2-Rb(1)-O(4)#3                    | 111.96(13) | O(5)#8-Y(1)-O(4)#9  | 94.63(10)  |
| O(2)-Rb(1)-O(3)#4                      | 122.72(16) | O(3)-Y(1)-O(4)#9    | 131.7(2)   |
| O(3)-Rb(1)-O(3)#4                      | 113.03(9)  | O(3)#9-Y(1)-O(4)#9  | 58.1(2)    |
| O(1)#1-Rb(1)-O(3)#4                    | 65.90(18)  | O(1)-Y(1)-O(4)      | 83.87(18)  |
| O(3)#2-Rb(1)-O(3)#4                    | 46.3(2)    | O(5)#8-Y(1)-O(4)    | 94.63(10)  |
| O(4)#3-Rb(1)-O(3)#4                    | 108.45(12) | O(3)-Y(1)-O(4)      | 58.1(2)    |
| O(2)-Rb(1)-O(5)#3                      | 126.35(19) | O(3)#9-Y(1)-O(4)    | 131.7(2)   |
| O(3)-Rb(1)-O(5)#3                      | 80.75(18)  | O(4)#9-Y(1)-O(4)    | 167.7(4)   |
| O(1)#1-Rb(1)-O(5)#3                    | 152.35(16) | O(1)-Y(1)-O(2)      | 59.5(2)    |
| O(3)#2-Rb(1)-O(5)#3                    | 64.40(18)  | O(3)-B(2)-O(3)#10   | 124.6(11)  |
| O(4)#3-Rb(1)-O(5)#3                    | 93.27(14)  | O(3)-B(2)-O(4)      | 117.7(5)   |
| O(3)#4-Rb(1)-O(5)#3                    | 110.65(18) | O(3)#10-B(2)-O(4)   | 117.7(5)   |
| O(2)-Rb(1)-O(1)#3                      | 129.31(19) |                     |            |
| <b>CaRbYB<sub>2</sub>O<sub>6</sub></b> |            |                     |            |
| Rb(1)-O(5)                             | 2.841(9)   | O(6)#5-Ca(1)-O(2)#6 | 96.4(3)    |
| Rb(1)-O(3)#1                           | 2.890(8)   | O(6)#5-Ca(1)-O(5)   | 76.8(3)    |
| Rb(1)-O(2)#2                           | 2.904(9)   | O(2)#6-Ca(1)-O(5)   | 168.5(3)   |
| Rb(1)-O(6)#3                           | 2.939(9)   | O(6)#5-Ca(1)-O(4)   | 156.1(4)   |
| Rb(1)-O(6)#4                           | 3.044(11)  | O(2)#6-Ca(1)-O(4)   | 88.3(3)    |
| Rb(1)-O(4)#3                           | 3.048(8)   | O(5)-Ca(1)-O(4)     | 94.3(3)    |
| Rb(1)-O(4)#4                           | 3.166(9)   | O(6)#5-Ca(1)-O(3)#1 | 72.8(3)    |
| Rb(1)-O(1)                             | 3.324(9)   | O(2)#6-Ca(1)-O(3)#1 | 117.2(3)   |
| Ca(1)-O(6)#5                           | 2.283(9)   | O(5)-Ca(1)-O(3)#1   | 70.0(3)    |
| Ca(1)-O(2)#6                           | 2.338(9)   | O(4)-Ca(1)-O(3)#1   | 125.5(3)   |
| Ca(1)-O(5)                             | 2.427(9)   | O(6)#5-Ca(1)-O(1)   | 147.8(4)   |
| Ca(1)-O(4)                             | 2.503(9)   | O(2)#6-Ca(1)-O(1)   | 77.6(3)    |
| Ca(1)-O(3)#1                           | 2.538(8)   | O(5)-Ca(1)-O(1)     | 113.0(3)   |
| Ca(1)-O(1)                             | 2.539(9)   | O(4)-Ca(1)-O(1)     | 56.1(3)    |
| Ca(1)-O(3)#6                           | 2.561(8)   | O(3)#1-Ca(1)-O(1)   | 81.8(3)    |
| Ca(1)-O(5)#1                           | 2.857(10)  | O(6)#5-Ca(1)-O(3)#6 | 88.9(3)    |
| Ca(1)-O(2)                             | 2.907(10)  | O(2)#6-Ca(1)-O(3)#6 | 57.4(3)    |
| Y(001)-O(4)                            | 2.269(8)   | O(5)-Ca(1)-O(3)#6   | 112.7(3)   |
| Y(001)-O(2)                            | 2.271(8)   | O(4)-Ca(1)-O(3)#6   | 73.9(3)    |
| Y(001)-O(5)#7                          | 2.278(9)   | O(3)#1-Ca(1)-O(3)#6 | 160.64(14) |
| Y(001)-O(3)#6                          | 2.323(8)   | O(1)-Ca(1)-O(3)#6   | 112.7(3)   |
| Y(001)-O(1)#8                          | 2.359(8)   | O(6)#5-Ca(1)-O(5)#1 | 80.4(3)    |
| Y(001)-O(6)#9                          | 2.362(9)   | O(2)#6-Ca(1)-O(5)#1 | 65.0(3)    |

|                     |           |                      |            |
|---------------------|-----------|----------------------|------------|
| Y(001)-O(1)#9       | 2.517(9)  | O(5)-Ca(1)-O(5)#1    | 121.93(10) |
| B(1)-O(4)           | 1.360(14) | O(4)-Ca(1)-O(5)#1    | 122.4(3)   |
| B(1)-O(6)           | 1.373(14) | O(3)#1-Ca(1)-O(5)#1  | 52.3(2)    |
| B(1)-O(1)           | 1.387(14) | O(1)-Ca(1)-O(5)#1    | 68.3(3)    |
| B(2)-O(5)           | 1.352(13) | O(3)#6-Ca(1)-O(5)#1  | 119.5(2)   |
| B(2)-O(2)           | 1.376(13) | O(6)#5-Ca(1)-O(2)    | 94.0(3)    |
| B(2)-O(3)           | 1.376(13) | O(2)#6-Ca(1)-O(2)    | 121.03(10) |
| O(5)-Rb(1)-O(3)#1   | 59.6(2)   | O(5)-Ca(1)-O(2)      | 51.4(3)    |
| O(5)-Rb(1)-O(2)#2   | 58.9(2)   | O(4)-Ca(1)-O(2)      | 63.9(3)    |
| O(3)#1-Rb(1)-O(2)#2 | 61.3(2)   | O(3)#1-Ca(1)-O(2)    | 121.3(3)   |
| O(5)-Rb(1)-O(6)#3   | 70.7(3)   | O(1)-Ca(1)-O(2)      | 116.4(3)   |
| O(3)#1-Rb(1)-O(6)#3 | 124.1(2)  | O(3)#6-Ca(1)-O(2)    | 65.0(2)    |
| O(2)#2-Rb(1)-O(6)#3 | 72.3(3)   | O(5)#1-Ca(1)-O(2)    | 172.5(2)   |
| O(5)-Rb(1)-O(6)#4   | 125.3(2)  | O(4)-Y(001)-O(2)     | 78.9(3)    |
| O(3)#1-Rb(1)-O(6)#4 | 69.9(2)   | O(4)-Y(001)-O(5)#7   | 150.5(3)   |
| O(2)#2-Rb(1)-O(6)#4 | 79.9(2)   | O(2)-Y(001)-O(5)#7   | 76.8(3)    |
| O(6)#3-Rb(1)-O(6)#4 | 131.4(2)  | O(4)-Y(001)-O(3)#6   | 83.0(3)    |
| B(1)#4-Rb(1)-O(6)#4 | 26.3(3)   | O(2)-Y(001)-O(3)#6   | 80.0(3)    |
| O(5)-Rb(1)-O(4)#3   | 117.4(2)  | O(5)#7-Y(001)-O(3)#6 | 76.6(3)    |
| O(3)#1-Rb(1)-O(4)#3 | 164.2(2)  | O(4)-Y(001)-O(1)#8   | 111.2(3)   |
| O(2)#2-Rb(1)-O(4)#3 | 103.4(2)  | O(2)-Y(001)-O(1)#8   | 82.8(3)    |
| O(6)#3-Rb(1)-O(4)#3 | 47.5(2)   | O(5)#7-Y(001)-O(1)#8 | 81.9(3)    |
| B(1)#4-Rb(1)-O(4)#3 | 89.1(3)   | O(3)#6-Y(001)-O(1)#8 | 155.0(3)   |
| O(6)#4-Rb(1)-O(4)#3 | 105.3(2)  | O(4)-Y(001)-O(6)#9   | 117.1(3)   |
| O(5)-Rb(1)-O(4)#4   | 145.5(2)  | O(2)-Y(001)-O(6)#9   | 148.3(3)   |
| O(3)#1-Rb(1)-O(4)#4 | 91.1(2)   | O(5)#7-Y(001)-O(6)#9 | 78.2(3)    |
| O(2)#2-Rb(1)-O(4)#4 | 125.4(2)  | O(3)#6-Y(001)-O(6)#9 | 75.5(3)    |
| O(6)#3-Rb(1)-O(4)#4 | 143.2(2)  | O(1)#8-Y(001)-O(6)#9 | 112.6(3)   |
| B(1)#4-Rb(1)-O(4)#4 | 25.3(3)   | O(4)-Y(001)-O(1)#9   | 94.6(3)    |
| O(6)#4-Rb(1)-O(4)#4 | 45.6(2)   | O(2)-Y(001)-O(1)#9   | 153.0(3)   |
| O(4)#3-Rb(1)-O(4)#4 | 95.7(2)   | O(5)#7-Y(001)-O(1)#9 | 114.6(3)   |
| O(5)-Rb(1)-O(1)     | 84.0(2)   | O(3)#6-Y(001)-O(1)#9 | 125.6(3)   |
| O(3)#1-Rb(1)-O(1)   | 64.3(2)   | O(1)#8-Y(001)-O(1)#9 | 75.3(3)    |
| O(2)#2-Rb(1)-O(1)   | 124.2(2)  | O(6)#9-Y(001)-O(1)#9 | 57.5(3)    |
| O(6)#3-Rb(1)-O(1)   | 135.9(3)  | O(4)-B(1)-O(6)       | 123.8(10)  |
| B(1)#4-Rb(1)-O(1)   | 88.2(3)   | O(4)-B(1)-O(1)       | 119.4(10)  |
| O(6)#4-Rb(1)-O(1)   | 92.6(2)   | O(6)-B(1)-O(1)       | 116.7(10)  |
| O(4)#3-Rb(1)-O(1)   | 131.5(2)  | O(5)-B(2)-O(2)       | 119.1(9)   |

|                                                                 |           |                      |            |
|-----------------------------------------------------------------|-----------|----------------------|------------|
| O(4)#4-Rb(1)-O(1)                                               | 65.6(2)   | O(5)-B(2)-O(3)       | 122.7(10)  |
| B(1)#3-Rb(1)-O(1)                                               | 131.3(2)  | O(2)-B(2)-O(3)       | 118.2(9)   |
| <b>Li<sub>2</sub>RbY<sub>4</sub>B<sub>5</sub>O<sub>15</sub></b> |           |                      |            |
| Rb(1)-O(7)                                                      | 2.944(5)  | O(4)#4-Li(2)-O(6)#4  | 159.8(8)   |
| Rb(1)-O(11)                                                     | 2.962(5)  | O(10)-Y(1)-O(13)#3   | 149.72(12) |
| Rb(1)-O(8)                                                      | 2.993(5)  | O(10)-Y(1)-O(13)#6   | 149.72(12) |
| Rb(1)-O(3)                                                      | 3.000(6)  | O(13)#3-Y(1)-O(13)#6 | 60.6(2)    |
| Rb(1)-O(15)                                                     | 3.009(6)  | O(10)-Y(1)-O(12)#3   | 104.96(15) |
| Rb(1)-O(9)                                                      | 3.144(6)  | O(13)#3-Y(1)-O(12)#3 | 69.95(19)  |
| Rb(1)-O(12)#1                                                   | 3.204(6)  | O(13)#6-Y(1)-O(12)#3 | 84.08(19)  |
| Li(1)-O(8)#3                                                    | 1.902(13) | O(10)-Y(1)-O(12)#6   | 104.96(15) |
| Li(1)-O(16)                                                     | 1.961(13) | O(13)#3-Y(1)-O(12)#6 | 84.08(19)  |
| Li(1)-O(10)                                                     | 1.962(12) | O(13)#6-Y(1)-O(12)#6 | 69.95(19)  |
| Li(1)-O(13)                                                     | 2.002(15) | O(12)#3-Y(1)-O(12)#6 | 150.1(3)   |
| Li(1)-O(1)                                                      | 2.138(15) | O(10)-Y(1)-O(3)#3    | 79.60(14)  |
| Li(2)-O(7)                                                      | 1.880(14) | O(13)#3-Y(1)-O(3)#3  | 116.53(18) |
| Li(2)-O(16)#4                                                   | 1.904(15) | O(13)#6-Y(1)-O(3)#3  | 82.25(18)  |
| Li(2)-O(14)#1                                                   | 1.918(12) | O(12)#3-Y(1)-O(3)#3  | 55.78(17)  |
| Li(2)-O(4)#4                                                    | 2.037(16) | O(12)#6-Y(1)-O(3)#3  | 130.96(17) |
| Li(2)-O(6)#4                                                    | 2.099(16) | O(10)-Y(1)-O(3)#6    | 79.60(14)  |
| Y(1)-O(10)                                                      | 2.266(8)  | O(13)#3-Y(1)-O(3)#6  | 82.25(18)  |
| Y(1)-O(13)#3                                                    | 2.355(5)  | O(13)#6-Y(1)-O(3)#6  | 116.53(18) |
| Y(1)-O(13)#6                                                    | 2.355(5)  | O(12)#3-Y(1)-O(3)#6  | 130.96(17) |
| Y(1)-O(12)#3                                                    | 2.498(6)  | O(12)#6-Y(1)-O(3)#6  | 55.78(17)  |
| Y(1)-O(12)#6                                                    | 2.498(6)  | O(3)#3-Y(1)-O(3)#6   | 159.2(3)   |
| Y(1)-O(3)#3                                                     | 2.509(5)  | O(10)-Y(1)-O(1)#7    | 78.23(13)  |
| Y(1)-O(3)#6                                                     | 2.509(5)  | O(13)#3-Y(1)-O(1)#7  | 72.48(17)  |
| Y(1)-O(1)#7                                                     | 2.581(5)  | O(13)#6-Y(1)-O(1)#7  | 130.79(18) |
| Y(1)-O(1)                                                       | 2.581(5)  | O(12)#3-Y(1)-O(1)#7  | 65.98(17)  |
| Y(2)-O(11)                                                      | 2.204(5)  | O(12)#6-Y(1)-O(1)#7  | 120.82(16) |
| Y(2)-O(15)                                                      | 2.238(5)  | O(3)#3-Y(1)-O(1)#7   | 108.01(17) |
| Y(2)-O(7)#5                                                     | 2.246(6)  | O(3)#6-Y(1)-O(1)#7   | 67.49(17)  |
| Y(2)-O(9)#5                                                     | 2.311(5)  | O(10)-Y(1)-O(1)      | 78.23(13)  |
| Y(2)-O(11)#8                                                    | 2.344(6)  | O(13)#3-Y(1)-O(1)    | 130.79(18) |
| Y(2)-O(6)#9                                                     | 2.376(5)  | O(13)#6-Y(1)-O(1)    | 72.48(17)  |
| Y(2)-O(5)#8                                                     | 2.508(6)  | O(12)#3-Y(1)-O(1)    | 120.82(16) |
| Y(3)-O(16)                                                      | 2.234(6)  | O(12)#6-Y(1)-O(1)    | 65.98(17)  |
| Y(3)-O(12)                                                      | 2.322(5)  | O(3)#3-Y(1)-O(1)     | 67.49(17)  |

---

|              |           |                     |            |
|--------------|-----------|---------------------|------------|
| Y(3)-O(4)    | 2.328(5)  | O(3)#6-Y(1)-O(1)    | 108.02(17) |
| Y(3)-O(13)   | 2.356(5)  | O(1)#7-Y(1)-O(1)    | 156.5(3)   |
| Y(3)-O(5)#11 | 2.368(5)  | O(11)-Y(2)-O(15)    | 90.5(2)    |
| Y(3)-O(2)#3  | 2.379(5)  | O(11)-Y(2)-O(7)#5   | 88.7(2)    |
| Y(3)-O(1)#1  | 2.398(6)  | O(15)-Y(2)-O(7)#5   | 88.5(2)    |
| Y(3)-O(6)#1  | 2.447(6)  | O(11)-Y(2)-O(9)#5   | 101.5(2)   |
| Y(4)-O(8)    | 2.244(6)  | O(15)-Y(2)-O(9)#5   | 166.1(2)   |
| Y(4)-O(3)    | 2.271(5)  | O(7)#5-Y(2)-O(9)#5  | 85.0(2)    |
| Y(4)-O(5)#5  | 2.290(5)  | O(11)-Y(2)-O(11)#8  | 72.8(2)    |
| Y(4)-O(15)#6 | 2.331(6)  | O(15)-Y(2)-O(11)#8  | 105.1(2)   |
| Y(4)-O(2)#12 | 2.338(5)  | O(7)#5-Y(2)-O(11)#8 | 156.84(19) |
| Y(4)-O(1)#2  | 2.348(5)  | O(9)#5-Y(2)-O(11)#8 | 85.2(2)    |
| Y(4)-O(2)#6  | 2.461(6)  | O(11)-Y(2)-O(6)#9   | 167.9(2)   |
| Y(5)-O(14)   | 2.285(9)  | O(15)-Y(2)-O(6)#9   | 91.01(19)  |
| Y(5)-O(4)#11 | 2.340(6)  | O(7)#5-Y(2)-O(6)#9  | 79.31(19)  |
| Y(5)-O(4)#6  | 2.340(6)  | O(9)#5-Y(2)-O(6)#9  | 75.75(19)  |
| Y(5)-O(9)#11 | 2.348(6)  | O(11)#8-Y(2)-O(6)#9 | 118.29(19) |
| Y(5)-O(9)#6  | 2.348(6)  | O(11)-Y(2)-O(5)#8   | 117.68(19) |
| Y(5)-O(6)    | 2.462(5)  | O(15)-Y(2)-O(5)#8   | 71.94(19)  |
| Y(5)-O(6)#14 | 2.462(5)  | O(7)#5-Y(2)-O(5)#8  | 146.38(18) |
| B(1)-O(4)#14 | 1.358(9)  | O(9)#5-Y(2)-O(5)#8  | 107.60(19) |
| B(1)-O(4)    | 1.358(9)  | O(11)#8-Y(2)-O(5)#8 | 56.78(18)  |
| B(1)-O(14)   | 1.368(15) | O(6)#9-Y(2)-O(5)#8  | 74.15(18)  |
| B(2)-O(10)   | 1.367(16) | O(16)-Y(3)-O(12)    | 109.5(2)   |
| B(2)-O(13)#7 | 1.385(9)  | O(16)-Y(3)-O(4)     | 78.2(2)    |
| B(2)-O(13)   | 1.385(9)  | O(12)-Y(3)-O(4)     | 77.72(19)  |
| B(3)-O(16)   | 1.347(12) | O(16)-Y(3)-O(13)    | 77.70(19)  |
| B(3)-O(1)    | 1.394(11) | O(12)-Y(3)-O(13)    | 73.05(19)  |
| B(3)-O(6)    | 1.395(10) | O(4)-Y(3)-O(13)     | 132.75(17) |
| B(4)-O(12)   | 1.370(10) | O(16)-Y(3)-O(5)#11  | 88.3(2)    |
| B(4)-O(9)    | 1.375(10) | O(12)-Y(3)-O(5)#11  | 142.69(19) |
| B(4)-O(3)    | 1.383(10) | O(4)-Y(3)-O(5)#11   | 74.24(17)  |
| B(5)-O(7)    | 1.354(11) | O(13)-Y(3)-O(5)#11  | 144.10(17) |
| B(5)-O(11)   | 1.386(10) | O(16)-Y(3)-O(2)#3   | 90.53(19)  |
| B(5)-O(5)    | 1.390(10) | O(12)-Y(3)-O(2)#3   | 137.08(19) |
| B(6)-O(8)    | 1.345(11) | O(4)-Y(3)-O(2)#3    | 144.85(18) |
| B(6)-O(15)   | 1.393(10) | O(13)-Y(3)-O(2)#3   | 74.99(17)  |
| B(6)-O(2)    | 1.402(10) | O(5)#11-Y(3)-O(2)#3 | 72.22(17)  |

---



|                       |            |                      |            |
|-----------------------|------------|----------------------|------------|
| O(7)-Rb(1)-O(11)      | 47.88(15)  | O(16)-Y(3)-O(1)#1    | 151.82(19) |
| O(7)-Rb(1)-O(8)       | 120.09(15) | O(12)-Y(3)-O(1)#1    | 71.75(19)  |
| O(11)-Rb(1)-O(8)      | 103.31(15) | O(4)-Y(3)-O(1)#1     | 127.89(19) |
| O(7)-Rb(1)-O(3)       | 100.28(15) | O(13)-Y(3)-O(1)#1    | 75.92(18)  |
| O(11)-Rb(1)-O(3)      | 134.01(15) | O(5)#11-Y(3)-O(1)#1  | 107.60(18) |
| O(8)-Rb(1)-O(3)       | 60.30(16)  | O(2)#3-Y(3)-O(1)#1   | 73.27(18)  |
| O(7)-Rb(1)-O(15)      | 104.54(14) | O(16)-Y(3)-O(6)#1    | 149.04(19) |
| O(11)-Rb(1)-O(15)     | 63.80(15)  | O(12)-Y(3)-O(6)#1    | 72.85(19)  |
| O(8)-Rb(1)-O(15)      | 47.19(15)  | O(4)-Y(3)-O(6)#1     | 72.13(19)  |
| O(3)-Rb(1)-O(15)      | 106.44(15) | O(13)-Y(3)-O(6)#1    | 129.89(19) |
| O(7)-Rb(1)-O(9)       | 60.65(15)  | O(5)#11-Y(3)-O(6)#1  | 75.43(18)  |
| O(11)-Rb(1)-O(9)      | 107.59(15) | O(2)#3-Y(3)-O(6)#1   | 108.68(18) |
| O(8)-Rb(1)-O(9)       | 101.84(16) | O(1)#1-Y(3)-O(6)#1   | 59.11(19)  |
| O(3)-Rb(1)-O(9)       | 46.58(15)  | O(14)-Y(5)-O(4)#11   | 150.12(12) |
| O(15)-Rb(1)-O(9)      | 136.48(15) | O(14)-Y(5)-O(4)#6    | 150.12(12) |
| O(7)-Rb(1)-O(12)#1    | 118.63(15) | O(4)#11-Y(5)-O(4)#6  | 59.8(2)    |
| O(11)-Rb(1)-O(12)#1   | 93.67(15)  | O(14)-Y(5)-O(9)#11   | 83.38(15)  |
| O(8)-Rb(1)-O(12)#1    | 113.46(15) | O(4)#11-Y(5)-O(9)#11 | 107.16(19) |
| O(3)-Rb(1)-O(12)#1    | 132.22(15) | O(4)#6-Y(5)-O(9)#11  | 84.54(19)  |
| O(15)-Rb(1)-O(12)#1   | 90.37(15)  | O(14)-Y(5)-O(9)#6    | 83.38(15)  |
| O(9)-Rb(1)-O(12)#1    | 133.10(15) | O(4)#11-Y(5)-O(9)#6  | 84.54(19)  |
| O(8)#3-Li(1)-O(16)    | 113.3(6)   | O(4)#6-Y(5)-O(9)#6   | 107.16(19) |
| O(8)#3-Li(1)-O(10)    | 140.7(7)   | O(9)#11-Y(5)-O(9)#6  | 166.8(3)   |
| O(16)-Li(1)-O(10)     | 106.0(6)   | O(14)-Y(5)-O(6)      | 78.71(13)  |
| O(8)#3-Li(1)-O(13)    | 103.8(6)   | O(4)#11-Y(5)-O(6)    | 130.85(18) |
| O(16)-Li(1)-O(13)     | 93.2(6)    | O(4)#6-Y(5)-O(6)     | 71.67(18)  |
| O(10)-Li(1)-O(13)     | 74.3(5)    | O(9)#11-Y(5)-O(6)    | 73.46(18)  |
| O(8)#3-Li(1)-O(1)     | 94.9(6)    | O(9)#6-Y(5)-O(6)     | 103.86(18) |
| O(16)-Li(1)-O(1)      | 70.9(5)    | O(14)-Y(5)-O(6)#14   | 78.71(13)  |
| O(10)-Li(1)-O(1)      | 96.8(6)    | O(4)#11-Y(5)-O(6)#14 | 71.67(18)  |
| O(13)-Li(1)-O(1)      | 159.3(7)   | O(4)#6-Y(5)-O(6)#14  | 130.85(18) |
| O(7)-Li(2)-O(16)#4    | 116.3(7)   | O(9)#11-Y(5)-O(6)#14 | 103.86(18) |
| O(7)-Li(2)-O(14)#1    | 130.1(8)   | O(9)#6-Y(5)-O(6)#14  | 73.46(18)  |
| O(16)#4-Li(2)-O(14)#1 | 113.6(7)   | O(6)-Y(5)-O(6)#14    | 157.4(3)   |
| O(7)-Li(2)-O(4)#4     | 104.1(7)   | O(7)-B(5)-O(11)      | 122.0(8)   |
| O(16)#4-Li(2)-O(4)#4  | 93.8(6)    | O(7)-B(5)-O(5)       | 125.1(8)   |
| O(14)#1-Li(2)-O(4)#4  | 73.6(5)    | O(11)-B(5)-O(5)      | 112.8(8)   |
| O(7)-Li(2)-O(6)#4     | 95.6(6)    | O(8)-B(6)-O(15)      | 122.7(7)   |

|                                                                 |          |                    |           |
|-----------------------------------------------------------------|----------|--------------------|-----------|
| O(16)#4-Li(2)-O(6)#4                                            | 73.2(5)  | O(8)-B(6)-O(2)     | 124.8(8)  |
| O(14)#1-Li(2)-O(6)#4                                            | 97.1(6)  | O(15)-B(6)-O(2)    | 112.3(8)  |
| <b>Li<sub>2</sub>CsY<sub>4</sub>B<sub>5</sub>O<sub>15</sub></b> |          |                    |           |
| Cs(1)-O(12)#1                                                   | 3.033(2) | O(14)-Y(1)-O(5)#5  | 90.43(8)  |
| Cs(1)-O(10)                                                     | 3.090(2) | O(11)-Y(1)-O(5)#5  | 145.42(8) |
| Cs(1)-O(4)                                                      | 3.094(2) | O(9)-Y(1)-O(5)#5   | 136.06(8) |
| Cs(1)-O(15)                                                     | 3.100(2) | O(7)#5-Y(1)-O(5)#5 | 72.21(8)  |
| Cs(1)-O(13)                                                     | 3.120(3) | O(6)-Y(1)-O(5)#5   | 76.06(8)  |
| Cs(1)-O(9)#2                                                    | 3.217(3) | O(14)-Y(1)-O(3)#6  | 152.27(8) |
| Cs(1)-O(2)#1                                                    | 3.224(2) | O(11)-Y(1)-O(3)#6  | 128.06(8) |
| Li(1)-O(15)                                                     | 1.910(6) | O(9)-Y(1)-O(3)#6   | 70.45(8)  |
| Li(1)-O(14)                                                     | 1.940(6) | O(7)#5-Y(1)-O(3)#6 | 107.43(8) |
| Li(1)-O(8)#4                                                    | 2.000(6) | O(6)-Y(1)-O(3)#6   | 77.11(8)  |
| Li(1)-O(6)                                                      | 2.014(7) | O(5)#5-Y(1)-O(3)#6 | 73.28(8)  |
| Li(1)-O(3)                                                      | 2.128(6) | O(14)-Y(1)-O(1)#7  | 148.69(8) |
| Li(2)-O(12)                                                     | 1.867(7) | O(11)-Y(1)-O(1)#7  | 72.46(8)  |
| Li(2)-O(14)#5                                                   | 1.907(6) | O(9)-Y(1)-O(1)#7   | 71.72(9)  |
| Li(2)-O(16)#5                                                   | 1.962(6) | O(7)#5-Y(1)-O(1)#7 | 75.76(8)  |
| Li(2)-O(11)#5                                                   | 2.045(6) | O(6)-Y(1)-O(1)#7   | 130.26(8) |
| Li(2)-O(1)                                                      | 2.107(6) | O(5)#5-Y(1)-O(1)#7 | 109.08(8) |
| Y(1)-O(14)                                                      | 2.251(2) | O(3)#6-Y(1)-O(1)#7 | 59.03(8)  |
| Y(1)-O(11)                                                      | 2.326(2) | O(10)-Y(2)-O(13)   | 93.76(9)  |
| Y(1)-O(9)                                                       | 2.335(2) | O(10)-Y(2)-O(12)   | 88.11(9)  |
| Y(1)-O(7)#5                                                     | 2.348(2) | O(13)-Y(2)-O(12)   | 87.04(8)  |
| Y(1)-O(6)                                                       | 2.361(2) | O(10)-Y(2)-O(2)    | 99.14(9)  |
| Y(1)-O(5)#5                                                     | 2.390(2) | O(13)-Y(2)-O(2)    | 165.70(9) |
| Y(1)-O(3)#6                                                     | 2.401(2) | O(12)-Y(2)-O(2)    | 87.22(8)  |
| Y(1)-O(1)#7                                                     | 2.455(2) | O(10)-Y(2)-O(10)#3 | 72.55(10) |
| Y(2)-O(10)                                                      | 2.205(2) | O(13)-Y(2)-O(10)#3 | 103.52(8) |
| Y(2)-O(13)                                                      | 2.230(2) | O(12)-Y(2)-O(10)#3 | 158.33(8) |
| Y(2)-O(12)                                                      | 2.249(2) | O(2)-Y(2)-O(10)#3  | 86.34(8)  |
| Y(2)-O(2)                                                       | 2.325(2) | O(10)-Y(2)-O(1)    | 166.17(8) |
| Y(2)-O(10)#3                                                    | 2.361(2) | O(13)-Y(2)-O(1)    | 89.97(9)  |
| Y(2)-O(1)                                                       | 2.388(2) | O(12)-Y(2)-O(1)    | 78.78(8)  |
| Y(2)-O(7)#6                                                     | 2.524(2) | O(2)-Y(2)-O(1)     | 76.06(8)  |
| Y(3)-O(16)#8                                                    | 2.271(3) | O(10)#3-Y(2)-O(1)  | 119.46(8) |
| Y(3)-O(11)#9                                                    | 2.347(2) | O(10)-Y(2)-O(7)#6  | 120.04(8) |
| Y(3)-O(11)#10                                                   | 2.347(2) | O(13)-Y(2)-O(7)#6  | 71.99(8)  |

---

|               |          |                       |            |
|---------------|----------|-----------------------|------------|
| Y(3)-O(2)#1   | 2.355(3) | O(12)-Y(2)-O(7)#6     | 145.11(8)  |
| Y(3)-O(2)#11  | 2.355(3) | O(2)-Y(2)-O(7)#6      | 106.25(8)  |
| Y(3)-O(1)#1   | 2.477(2) | O(10)#3-Y(2)-O(7)#6   | 56.44(8)   |
| Y(3)-O(1)#11  | 2.477(2) | O(1)-Y(2)-O(7)#6      | 73.77(8)   |
| Y(4)-O(15)    | 2.251(2) | O(16)#8-Y(3)-O(11)#9  | 150.19(5)  |
| Y(4)-O(4)     | 2.271(3) | O(16)#8-Y(3)-O(11)#10 | 150.19(5)  |
| Y(4)-O(7)     | 2.305(2) | O(11)#9-Y(3)-O(11)#10 | 59.61(11)  |
| Y(4)-O(5)     | 2.329(2) | O(16)#8-Y(3)-O(2)#1   | 84.93(6)   |
| Y(4)-O(13)#4  | 2.343(2) | O(11)#9-Y(3)-O(2)#1   | 104.61(8)  |
| Y(4)-O(3)     | 2.343(2) | O(11)#10-Y(3)-O(2)#1  | 84.33(8)   |
| Y(4)-O(5)#12  | 2.461(2) | O(16)#8-Y(3)-O(2)#11  | 84.93(6)   |
| Y(5)-O(8)     | 2.261(3) | O(11)#9-Y(3)-O(2)#11  | 84.33(8)   |
| Y(5)-O(6)     | 2.363(2) | O(11)#10-Y(3)-O(2)#11 | 104.61(8)  |
| Y(5)-O(6)#2   | 2.363(2) | O(2)#1-Y(3)-O(2)#11   | 169.86(12) |
| Y(5)-O(9)     | 2.454(2) | O(16)#8-Y(3)-O(1)#1   | 78.60(5)   |
| Y(5)-O(9)#2   | 2.454(2) | O(11)#9-Y(3)-O(1)#1   | 131.05(8)  |
| Y(5)-O(4)#6   | 2.537(2) | O(11)#10-Y(3)-O(1)#1  | 71.72(7)   |
| Y(5)-O(4)#13  | 2.537(2) | O(2)#1-Y(3)-O(1)#1    | 73.84(8)   |
| Y(5)-O(3)#6   | 2.632(2) | O(2)#11-Y(3)-O(1)#1   | 104.08(8)  |
| Y(5)-O(3)#13  | 2.632(2) | O(16)#8-Y(3)-O(1)#11  | 78.60(5)   |
| B(1)-O(9)#15  | 1.371(4) | O(11)#9-Y(3)-O(1)#11  | 71.72(7)   |
| B(1)-O(4)#1   | 1.373(4) | O(11)#10-Y(3)-O(1)#11 | 131.05(8)  |
| B(1)-O(2)     | 1.385(4) | O(2)#1-Y(3)-O(1)#11   | 104.08(8)  |
| B(2)-O(16)    | 1.368(6) | O(2)#11-Y(3)-O(1)#11  | 73.84(8)   |
| B(2)-O(11)#16 | 1.370(3) | O(1)#1-Y(3)-O(1)#11   | 157.20(11) |
| B(2)-O(11)    | 1.370(3) | O(15)-Y(4)-O(4)       | 84.98(9)   |
| B(3)-O(12)    | 1.346(5) | O(15)-Y(4)-O(7)       | 88.88(8)   |
| B(3)-O(10)#1  | 1.379(4) | O(4)-Y(4)-O(7)        | 109.73(8)  |
| B(3)-O(7)     | 1.410(4) | O(15)-Y(4)-O(5)       | 88.77(9)   |
| B(4)-O(6)#6   | 1.375(3) | O(4)-Y(4)-O(5)        | 172.55(8)  |
| B(4)-O(6)#13  | 1.375(3) | O(7)-Y(4)-O(5)        | 74.12(8)   |
| B(4)-O(8)     | 1.379(6) | O(15)-Y(4)-O(13)#4    | 156.17(8)  |
| B(5)-O(14)    | 1.348(5) | O(4)-Y(4)-O(13)#4     | 85.14(9)   |
| B(5)-O(3)     | 1.390(4) | O(7)-Y(4)-O(13)#4     | 74.20(8)   |
| B(5)-O(1)#5   | 1.395(4) | O(5)-Y(4)-O(13)#4     | 102.16(8)  |
| B(6)-O(15)    | 1.347(5) | O(15)-Y(4)-O(3)       | 80.24(8)   |
| B(6)-O(13)    | 1.387(4) | O(4)-Y(4)-O(3)        | 76.51(8)   |
| B(6)-O(5)#5   | 1.421(4) | O(7)-Y(4)-O(3)        | 167.04(8)  |

---

---

|                       |           |                      |            |
|-----------------------|-----------|----------------------|------------|
| O(12)#1-Cs(1)-O(10)   | 46.24(6)  | O(5)-Y(4)-O(3)       | 98.45(8)   |
| O(12)#1-Cs(1)-O(4)    | 98.11(6)  | O(13)#4-Y(4)-O(3)    | 118.22(8)  |
| O(10)-Cs(1)-O(4)      | 128.76(6) | O(6)#2-Y(5)-O(9)     | 86.23(8)   |
| O(12)#1-Cs(1)-O(15)   | 116.68(6) | O(8)-Y(5)-O(9)#2     | 103.44(6)  |
| O(10)-Cs(1)-O(15)     | 100.31(6) | O(6)-Y(5)-O(9)#2     | 86.23(8)   |
| O(4)-Cs(1)-O(15)      | 59.09(6)  | O(6)#2-Y(5)-O(9)#2   | 70.31(8)   |
| O(12)#1-Cs(1)-O(13)   | 101.86(6) | O(9)-Y(5)-O(9)#2     | 153.13(12) |
| O(10)-Cs(1)-O(13)     | 62.84(6)  | O(8)-Y(5)-O(4)#6     | 81.02(6)   |
| O(4)-Cs(1)-O(13)      | 103.30(6) | O(6)-Y(5)-O(4)#6     | 81.43(7)   |
| O(15)-Cs(1)-O(13)     | 45.70(6)  | O(6)#2-Y(5)-O(4)#6   | 114.80(8)  |
| O(12)#1-Cs(1)-O(9)#2  | 120.70(6) | O(9)-Y(5)-O(4)#6     | 129.45(8)  |
| O(10)-Cs(1)-O(9)#2    | 95.94(6)  | O(9)#2-Y(5)-O(4)#6   | 55.74(8)   |
| O(4)-Cs(1)-O(9)#2     | 134.90(6) | O(8)-Y(5)-O(4)#13    | 81.02(6)   |
| O(15)-Cs(1)-O(9)#2    | 113.36(6) | O(6)-Y(5)-O(4)#13    | 114.80(8)  |
| O(13)-Cs(1)-O(9)#2    | 91.06(6)  | O(6)#2-Y(5)-O(4)#13  | 81.43(7)   |
| O(12)#1-Cs(1)-O(2)#1  | 60.49(6)  | O(9)-Y(5)-O(4)#13    | 55.74(8)   |
| O(10)-Cs(1)-O(2)#1    | 105.31(6) | O(9)#2-Y(5)-O(4)#13  | 129.45(8)  |
| O(4)-Cs(1)-O(2)#1     | 45.46(6)  | O(4)#6-Y(5)-O(4)#13  | 162.05(11) |
| O(15)-Cs(1)-O(2)#1    | 99.54(6)  | O(8)-Y(5)-O(3)#6     | 78.17(5)   |
| O(13)-Cs(1)-O(2)#1    | 132.17(6) | O(6)-Y(5)-O(3)#6     | 72.70(7)   |
| O(9)#2-Cs(1)-O(2)#1   | 136.71(7) | O(6)#2-Y(5)-O(3)#6   | 130.75(8)  |
| O(15)-Li(1)-O(14)     | 114.3(3)  | O(9)-Y(5)-O(3)#6     | 64.89(7)   |
| O(15)-Li(1)-O(8)#4    | 139.5(3)  | O(9)#2-Y(5)-O(3)#6   | 121.31(7)  |
| O(14)-Li(1)-O(8)#4    | 106.2(3)  | O(4)#6-Y(5)-O(3)#6   | 67.09(7)   |
| O(15)-Li(1)-O(6)      | 104.9(3)  | O(4)#13-Y(5)-O(3)#6  | 108.98(7)  |
| O(14)-Li(1)-O(6)      | 93.5(3)   | O(8)-Y(5)-O(3)#13    | 78.17(5)   |
| O(8)#4-Li(1)-O(6)     | 73.3(2)   | O(6)-Y(5)-O(3)#13    | 130.75(8)  |
| O(15)-Li(1)-O(3)      | 94.2(3)   | O(6)#2-Y(5)-O(3)#13  | 72.70(7)   |
| O(14)-Li(1)-O(3)      | 71.3(2)   | O(9)-Y(5)-O(3)#13    | 121.31(7)  |
| O(8)#4-Li(1)-O(3)     | 97.2(3)   | O(9)#2-Y(5)-O(3)#13  | 64.89(7)   |
| O(6)-Li(1)-O(3)       | 159.5(3)  | O(4)#6-Y(5)-O(3)#13  | 108.98(7)  |
| O(12)-Li(2)-O(14)#5   | 116.8(3)  | O(4)#13-Y(5)-O(3)#13 | 67.09(7)   |
| O(12)-Li(2)-O(16)#5   | 130.6(3)  | O(3)#6-Y(5)-O(3)#13  | 156.33(10) |
| O(14)#5-Li(2)-O(16)#5 | 112.5(3)  | O(9)#15-B(1)-O(4)#1  | 116.6(3)   |
| O(12)-Li(2)-O(11)#5   | 106.9(3)  | O(9)#15-B(1)-O(2)    | 118.6(3)   |
| O(14)#5-Li(2)-O(11)#5 | 93.1(3)   | O(4)#1-B(1)-O(2)     | 124.8(3)   |
| O(16)#5-Li(2)-O(11)#5 | 73.2(2)   | O(16)-B(2)-O(11)#16  | 121.6(2)   |
| O(12)-Li(2)-O(1)      | 95.4(3)   | O(16)-B(2)-O(11)     | 121.6(2)   |

---

|                    |           |                     |          |
|--------------------|-----------|---------------------|----------|
| O(14)#5-Li(2)-O(1) | 72.9(2)   | O(11)#16-B(2)-O(11) | 116.8(4) |
| O(16)#5-Li(2)-O(1) | 95.4(3)   | O(12)-B(3)-O(10)#1  | 124.0(3) |
| O(11)#5-Li(2)-O(1) | 157.4(3)  | O(12)-B(3)-O(7)     | 123.6(3) |
| O(14)-Y(1)-O(11)   | 77.62(8)  | O(10)#1-B(3)-O(7)   | 112.2(3) |
| O(14)-Y(1)-O(9)    | 111.13(9) | O(6)#6-B(4)-O(6)#13 | 118.2(4) |
| O(11)-Y(1)-O(9)    | 78.15(9)  | O(6)#6-B(4)-O(8)    | 120.9(2) |
| O(14)-Y(1)-O(7)#5  | 87.89(9)  | O(6)#13-B(4)-O(8)   | 120.9(2) |
| O(11)-Y(1)-O(7)#5  | 74.98(8)  | O(14)-B(5)-O(3)     | 120.3(3) |
| O(9)-Y(1)-O(7)#5   | 142.67(8) | O(14)-B(5)-O(1)#5   | 121.2(3) |
| O(14)-Y(1)-O(6)    | 77.24(8)  | O(3)-B(5)-O(1)#5    | 118.4(3) |
| O(11)-Y(1)-O(6)    | 130.60(8) | O(15)-B(6)-O(13)    | 124.1(3) |
| O(9)-Y(1)-O(6)     | 72.42(8)  | O(15)-B(6)-O(5)#5   | 123.6(3) |
| O(7)#5-Y(1)-O(6)   | 144.74(8) | O(13)-B(6)-O(5)#5   | 112.0(3) |

Symmetry transformations used to generate equivalent atoms:

#1  $-x+1, y-1/2, -z+1/2$  #2  $-x+2, -y+1, -z+1$  #3  $-x+1, -y+1, -z+1$   
#4  $-x+2, y-1/2, z$  #5  $x, -y+1/2, -z+1$  #6  $x-1, y, -z+1/2$   
#7  $x-1, y, z$  #8  $-x+1, y+1/2, -z+1/2$  #9  $x, y, -z+1/2$   
#10  $x, -y+3/2, -z+1$  #11  $-x+1, -y+1, z-1/2$  #12  $-x+1, y+1/2, z$   
#13  $x, -y+3/2, z+1/2$  #14  $-x+2, y+1/2, z$  #15  $x+1, y, z$  (LiRb<sub>2</sub>YB<sub>2</sub>O<sub>6</sub>)  
#1  $-x+1, y+1/2, -z+1/2$  #2  $x-1/2, y, -z+1/2$  #3  $-x+1, -y+1, -z+1$   
#4  $x-1/2, -y+3/2, -z+1$  #5  $x, -y+3/2, z-1/2$  #6  $-x+3/2, y+1/2, z$   
#7  $x+1/2, y, -z+1/2$  #8  $-x+3/2, y-1/2, z$  #9  $x+1/2, -y+3/2, -z+1$   
#10  $-x+2, -y+1, -z+1$  #11  $-x+1, y-1/2, -z+1/2$  #12  $x, -y+3/2, z+1/2$  (CaRbYB<sub>2</sub>O<sub>6</sub>)  
#1  $x, y-1, z$  #2  $-x+3/2, y-1, -z+1/2$  #3  $-x+3/2, y+1, -z+1/2$   
#4  $-x+1/2, y-1, -z+1/2$  #5  $-x+1, -y, -z+1$  #6  $x, y+1, z$   
#7  $-x+3/2, y, -z+1/2$  #8  $-x+1, -y-1, -z+1$  #9  $x+1/2, -y+1, z+1/2$   
#10  $-x+1, -y+1, -z+1$  #11  $-x+1/2, y+1, -z+1/2$  #12  $-x+2, -y, -z+1$   
#13  $-x+2, -y+1, -z+1$  #14  $-x+1/2, y, -z+1/2$  #15  $x-1/2, -y+1, z-1/2$  (Li<sub>2</sub>RbY<sub>4</sub>B<sub>5</sub>O<sub>15</sub>)  
#1  $-x, -y, -z+1$  #2  $-x+1/2, y, -z+1/2$  #3  $-x, -y+1, -z+1$   
#4  $x, y-1, z$  #5  $-x+1, -y, -z+1$  #6  $x, y+1, z$  #7  $-x+1, -y+1, -z+1$   
#8  $x-1, y, z$  #9  $-x+1/2, y-1, -z+1/2$  #10  $x-1, y-1, z$   
#11  $x-1/2, -y, z-1/2$  #12  $-x+1, -y-1, -z+1$  #13  $-x+1/2, y+1, -z+1/2$   
#14  $x+1/2, -y+1, z-1/2$  #15  $x-1/2, -y+1, z+1/2$  #16  $-x+3/2, y, -z+1/2$   
#17  $x+1/2, -y, z-1/2$  #18  $x+1, y+1, z$  #19  $x+1, y, z$  (Li<sub>2</sub>CsY<sub>4</sub>B<sub>5</sub>O<sub>15</sub>)
